# Supplementary material for: Long-term risk of neoplastic events after childhood growth hormone treatment: a population-based cohort study in Sweden
Source: PubMed Central journal article supplement (PMC10948557; doi:10.3389/fendo.2024.1360139), 2024-03-05

**Supplementary Appendix:**

**Long-term risk of neoplastic events after childhood growth hormone treatment: a population-based cohort study in Sweden**

**Table S1.** ICD-codes and number of cases for each neoplastic category

**Table S2.** Subcategorization for benign neoplasms and neoplasms of uncertain or unknown behavior and number of cases within each subcategory

**Table S3.** Basal characteristics for the patients and controls in the sensitivity analysis on a subset of patients and controls more similar in height (within 5 cm) at study start

**Table S4.** Number of events, person-years (pyrs), incidence rate ratios (IRRs), crude and adjusted hazard ratios (HRs) for overall and malignant neoplasms in the sensitivity analysis on a subset of patients and controls more similar in height (within 5 cm) at study start

**Table S5.** Incidence rate ratios (IRRs), crude and adjusted hazard ratios (HRs) for overall and malignant neoplasms among individuals prescribed rhGH-treatment after 18 years of age in the Prescribed Drug Register (2005-2020)

**Table S6.** Crude and adjusted hazard ratios for all neoplastic events with two-year lag period after end of treatment

**Table S7:** Crude and adjusted hazard ratios for malignant neoplasms with two-year lag period after end of treatment

**Table S8:** Hazard ratios for overall and malignant neoplasms by duration of follow-up, separated by sex

**Figure S1:** Kaplan-Meier curves of overall neoplastic events, separated by sex

**Figure S2:** Kaplan-Meier curves of malignant neoplastic events, separated by sex

**Table S1: ICD-codes and number of cases for each neoplastic category**

| Neoplastic category                                                                                   | ICD7    | ICD8    | ICD9    | ICD10   | Patients | Controls | P-value <sup>a</sup> |
|-------------------------------------------------------------------------------------------------------|---------|---------|---------|---------|----------|----------|----------------------|
| Malignant neoplasms of lip, oral cavity, and pharynx                                                  | 140-148 | 140-149 | 140-149 | C00-C14 | 0        | 12       | 1.000                |
| Malignant neoplasms of digestive organs                                                               | 150-159 | 150-159 | 150-159 | C15-C26 | 2        | 58       | 0.591                |
| Malignant neoplasms of respiratory and intrathoracic organs                                           | 160-165 | 160-163 | 160-165 | C30-C39 | 1        | 15       | 1.000                |
| Malignant neoplasms of bone and articular cartilage                                                   | 196-197 | 170-171 | 170-171 | C40-C41 | 2        | 27       | 0.708                |
| Melanoma and other malignant neoplasms of skin                                                        | 190-191 | 172-173 | 172-173 | C43-C44 | 10       | 215      | 0.274                |
| Malignant neoplasms of mesothelial and soft tissue                                                    |         |         |         | C45-C49 | 1        | 21       | 1.000                |
| Malignant neoplasm of breast                                                                          | 170     | 174     | 174     | C50-C50 | 1        | 29       | 1.000                |
| Malignant neoplasms of female genital organs                                                          | 171-176 | 180-184 | 180-184 | C51-C58 | 39       | 733      | 0.138                |
| Malignant neoplasms of male genital organs                                                            | 177-179 | 185-187 | 185-187 | C60-C63 | 5        | 92       | 0.835                |
| Malignant neoplasms of urinary tract                                                                  | 180-181 | 188-189 | 188-189 | C64-C68 | 0        | 15       | 0.620                |
| Malignant neoplasms of eye, brain, and other parts of central nervous system                          | 192-193 | 190-192 | 190-192 | C69-C72 | 4        | 67       | 1.000                |
| Malignant neoplasms of thyroid and other endocrine glands                                             | 194-195 | 193-194 | 193-194 | C73-C75 | 6        | 47       | 0.150                |
| Malignant neoplasms of ill-defined, secondary, and unspecified sites                                  | 198-199 | 195-199 | 195-199 | C76-C80 | 5        | 84       | 1.000                |
| Malignant neoplasms, stated or presumed to be primary, of lymphoid, hematopoietic, and related tissue | 200-207 | 200-209 | 200-208 | C81-C96 | 8        | 97       | 0.548                |
| Malignant neoplasms of independent (primary) multiple sites                                           |         |         |         | C97-C97 | 0        | 0        | NA                   |
| In situ neoplasms                                                                                     |         |         | 230-234 | D00-D09 | 22       | 440      | 0.180                |
| Benign neoplasms                                                                                      | 210-229 | 210-228 | 210-229 | D10-D36 | 386      | 5227     | 0.106                |
| Neoplasms of uncertain or unknown behavior                                                            | 230-239 | 230-239 | 235-239 | D37-D48 | 104      | 1229     | 0.035                |

<sup>a</sup> Fischer exact test

**Table S2: Subcategorization for benign neoplasms and neoplasms of uncertain or unknown behavior and number of cases within each subcategory**

| <b>Benign neoplasms</b>                                                                 | <b>ICD7</b> | <b>ICD8</b> | <b>ICD9</b> | <b>ICD10</b> | <b>Patients</b> | <b>Controls</b> | <b>P-value<sup>a</sup></b> |
|-----------------------------------------------------------------------------------------|-------------|-------------|-------------|--------------|-----------------|-----------------|----------------------------|
| Benign neoplasm of mouth, pharynx, and major salivary glands                            | 210         | 210         | 210         | D10-D11      | 4               | 110             | 0.189                      |
| Benign neoplasm of colon, rectum, anus, anal canal, and other parts of digestive system | 211         | 211         | 211         | D12-D13      | 4               | 51              | 0.789                      |
| Benign neoplasm of middle ear, respiratory system, and other intrathoracic organs       | 212         | 212         | 212         | D14- D15     | 3               | 23              | 0.420                      |
| Benign neoplasm of bone and articular cartilage                                         | 225         | 213         | 213         | D16          | 21              | 222             | 0.245                      |
| Benign lipomatous neoplasm                                                              | 226         | 214         | 214         | D17          | 15              | 282             | 0.238                      |
| Hemangioma and lymphangioma                                                             | 228         | 227         | 228         | D18          | 8               | 181             | 0.186                      |
| Benign neoplasm of mesothelial, connective, and other soft tissue                       | 227         | 215         | 215         | D19-D21      | 20              | 288             | 0.908                      |
| Melanocytic nevi and other benign neoplasms of skin                                     | 220, 222    | 216         | 216         | D22-D23      | 286             | 3871            | 1.000                      |
| Benign neoplasm of breast                                                               | 213         | 217         | 217         | D24          | 9               | 129             | 1.000                      |
| Benign neoplasms of uterus                                                              | 214-215     | 218-219     | 218-219     | D25-D26      | 5               | 123             | 0.217                      |
| Benign neoplasm of ovary and other female genital organs                                | 216-217     | 220-221     | 220-221     | D27-D28      | 10              | 106             | 0.455                      |
| Benign neoplasm of male genital organs                                                  | 218         | 222         | 222         | D29          | 1               | 25              | 1.000                      |
| Benign neoplasm of urinary organs                                                       | 219         | 223         | 223         | D30          | 1               | 4               | 0.300                      |
| Benign neoplasm of eye and adnexa                                                       |             | 224         | 224         | D31          | 9               | 62              | 0.059                      |
| Benign neoplasm of meninges, brain, and other parts of central nervous system           | 223         | 225         | 225         | D32-D33      | 5               | 45              | 0.391                      |
| Benign neoplasm of endocrine glands                                                     | 224         | 226         | 226-227     | D34-D35      | 13              | 51              | <0.001                     |
| Benign neoplasm of other and unspecified sites                                          | 229         | 228         | 229         | D36          | 3               | 40              | 1.000                      |

**Table S2: Subcategorization for benign neoplasms and neoplasms of uncertain or unknown behavior and number of cases within each subcategory (continued)**

| <b>Neoplasms of uncertain or unknown behaviour</b>                                               | <b>ICD7</b>   | <b>ICD8</b>   | <b>ICD9</b> | <b>ICD10</b> | <b>Patients</b> | <b>Controls</b> | <b>P-value<sup>a</sup></b> |
|--------------------------------------------------------------------------------------------------|---------------|---------------|-------------|--------------|-----------------|-----------------|----------------------------|
| Neoplasm of uncertain or unknown behavior of oral cavity and digestive organs                    | 230           | 230           | 235         | D37          | 10              | 105             | 0.715                      |
| Neoplasm of uncertain or unknown behavior of middle ear and respiratory and intrathoracic organs | 231           | 231           | 231         | D38          | 3               | 27              | 0.504                      |
| Neoplasm of uncertain or unknown behavior of female genital organs                               | 233-235       | 234-236       | 236         | D39          | 2               | 20              | 0.688                      |
| Neoplasm of uncertain or unknown behavior of male genital or urinary organs                      | 236           | 237           | 236         | D40-41       | 10              | 94              | 0.447                      |
| Neoplasm of uncertain or unknown behavior of meninges, brain, and central nervous system         | 237           | 238           | 237F-X      | D42-43       | 9               | 43              | 0.016                      |
| Neoplasm of uncertain or unknown behavior of endocrine glands                                    |               |               | 237A-E      | D44          | 5               | 52              | 0.799                      |
| Neoplasm of uncertain or unknown behavior of other and unspecified sites                         | 232, 238, 239 | 232, 233, 239 | 238-239     | D45-48       | 66              | 905             | 0.029                      |

<sup>a</sup> Fischer exact test

**Table S3: Basal characteristics for the patients and controls in the sensitivity analysis on a subset of patients and controls more similar in height (within 5 cm) at study start**

|                                   | <b>Patients</b><br>(n=837) | <b>Controls</b><br>(n=1,695) | <b>SMD<sup>a</sup></b> |
|-----------------------------------|----------------------------|------------------------------|------------------------|
| <b>Sex</b>                        |                            |                              | 0.06                   |
| Males, n (%)                      | 583 (69.7)                 | 1,131 (66.7)                 |                        |
| Females, n (%)                    | 254 (30.3)                 | 564 (33.3)                   |                        |
| <b>Gestational age (week)</b>     |                            |                              | 0.21                   |
| Mean (SD)                         | 38.5 (3.0)                 | 39.1 (2.2)                   |                        |
| <b>Birth length (SDS)</b>         |                            |                              | 0.30                   |
| Mean (SD)                         | -1.30 (1.4)                | -0.90 (1.3)                  |                        |
| <b>Birth weight (SDS)</b>         |                            |                              | 0.24                   |
| Mean (SD)                         | -0.81 (1.3)                | -0.52 (1.1)                  |                        |
| <b>Age at start (years)</b>       |                            |                              | -0.11                  |
| Mean (SD)                         | 7.94 (2.99)                | 7.60 (3.26)                  |                        |
| <b>Height at start (cm)</b>       |                            |                              | 0.15                   |
| Mean (SD)                         | 115.6 (17.5)               | 118.3 (19.7)                 |                        |
| <b>Family income level</b>        |                            |                              | -0.29                  |
| Mean (SD)                         | 3.2 (1.4)                  | 2.8 (1.4)                    |                        |
| <b>Parental educational level</b> |                            |                              | -0.26                  |
| Mean (SD)                         | 4.7 (1.4)                  | 4.4 (1.4)                    |                        |

<sup>a</sup> SMD=Standard Mean Differences

**Table S4: Number of events, person-years (pyrs), incidence rate ratios (IRRs), crude and adjusted hazard ratios (HRs) for overall and malignant neoplasms in the sensitivity analysis on a subset of patients and controls more similar in height (within 5 cm) at study start**

|                            | Events (n) | Pyrs  | IRR [95% CI]     | Crude HR [95% CI] | p-value | Adjusted HR [95% CI], restricted model <sup>a</sup> | p-value | Adjusted HR [95% CI], full model <sup>b</sup> | p-value |
|----------------------------|------------|-------|------------------|-------------------|---------|-----------------------------------------------------|---------|-----------------------------------------------|---------|
| <b>Overall neoplasms</b>   |            |       |                  |                   |         |                                                     |         |                                               |         |
| Controls (n=1,695)         | 196        | 32826 | 1.00 (Ref)       | 1.00 (Ref)        |         | 1.00 (Ref)                                          |         | 1.00 (Ref)                                    |         |
| Patients (n=837)           | 111        | 16089 | 1.16 [0.91-1.47] | 1.16 [0.91-1.46]  | 0.226   | 1.32 [1.01-1.72]                                    | 0.045   | 1.31 [0.97-1.77]                              | 0.073   |
| <b>Malignant neoplasms</b> |            |       |                  |                   |         |                                                     |         |                                               |         |
| Controls (n=1,695)         | 37         | 34458 | 1.00 (Ref)       | 1.00 (Ref)        |         | 1.00 (Ref)                                          |         | 1.00 (Ref)                                    |         |
| Patients (n=837)           | 18         | 17087 | 0.98 [0.53-1.77] | 0.98 [0.57-1.68]  | 0.931   | 1.38 [0.64-2.98]                                    | 0.414   | 1.91 [0.78-4.70]                              | 0.157   |

<sup>a</sup> Restricted model adjusted only for age at start, height at start and sex.

<sup>b</sup> Full model adjusted for gestational age, birth length, birth weight, age at start, height at start, parental educational level, family income and sex.

**Table S5: Incidence rate ratios (IRRs), crude and adjusted hazard ratios (HRs) for overall and malignant neoplasms among individuals prescribed rhGH-treatment after 18 years of age in the Prescribed Drug Register (2005-2020)**

|                                  | Events (n) | Pyrs    | IRR [95% CI]     | Crude HR [95% CI] | p-value | Adjusted HR [95% CI], restricted model <sup>b</sup> | p-value | Adjusted HR [95% CI], full model <sup>c</sup> | p-value |
|----------------------------------|------------|---------|------------------|-------------------|---------|-----------------------------------------------------|---------|-----------------------------------------------|---------|
| <b>Overall neoplasms</b>         |            |         |                  |                   |         |                                                     |         |                                               |         |
| Controls <sup>a</sup> (n=46,654) | 6,383      | 946,581 | 1.00 (Ref)       | 1.00 (Ref)        |         | 1.00 (Ref)                                          |         | 1.00 (Ref)                                    |         |
| Patients (n=191)                 | 34         | 3608    | 1.40 [0.97-1.95] | 1.45 [1.03-2.03]  | 0.034   | 2.16 [1.52-3.08]                                    | <0.001  | 2.13 [1.47-3.09]                              | <0.001  |
| <b>Malignant neoplasms</b>       |            |         |                  |                   |         |                                                     |         |                                               |         |
| Controls <sup>a</sup> (n=46,654) | 1305       | 999,830 | 1.00 (Ref)       | 1.00 (Ref)        |         | 1.00 (Ref)                                          |         | 1.00 (Ref)                                    |         |
| Patients (n=191)                 | 3          | 3951    | 0.58 [0.12-1.70] | 0.61 [0.20-1.88]  | 0.386   | 1.03 [0.33-3.23]                                    | 0.956   | 1.21 [0.39-3.77]                              | 0.738   |

<sup>a</sup> Only controls with same age range (18-52 years) kept as comparison group to exclude difference of age range between the patients and controls.

<sup>b</sup> Restricted model adjusted only for age at start, height at start and sex.

<sup>c</sup> Full model adjusted for gestational age, birth length, birth weight, age at start, height at start, parental educational level, family income and sex.

**Table S6: Crude and adjusted hazard ratios for all neoplastic events with two-year lag period after end of treatment**

|                                               | <b>N</b> | <b>Crude HR [95% CI]</b> | <b>Adjusted HR [95% CI], restricted model<sup>a</sup></b> | <b>Adjusted HR [95% CI], full model<sup>b</sup></b> |
|-----------------------------------------------|----------|--------------------------|-----------------------------------------------------------|-----------------------------------------------------|
| <b>All patients</b>                           | 3408     | 0.94 [0.85-1.05]         | 1.20 [1.04 -1.38]                                         | 1.14 [0.98-1.33]                                    |
| Male                                          | 2305     | 0.91 [0.79-1.06]         | 1.24 [1.02 -1.51]                                         | 1.18 [0.96-1.44]                                    |
| Female                                        | 1103     | 0.98 [0.84-1.14]         | 1.14 [0.93-1.40]                                          | 1.10 [0.88-1.37]                                    |
| <b>SGA<sup>c</sup></b>                        | 672      | 1.02 [0.81-1.28]         | 1.26 [0.98-1.61]                                          | 1.19 [0.92-1.54]                                    |
| male                                          | 423      | 0.85 [0.59-1.21]         | 1.18 [0.80-1.73]                                          | 1.12 [0.76-1.65]                                    |
| female                                        | 249      | 1.11 [0.82-1.50]         | 1.29 [0.92-1.81]                                          | 1.23 [0.86-1.75]                                    |
| <b>GHD<sup>c</sup></b>                        | 1837     | 0.92 [0.79-1.06]         | 1.18 [1.00-1.40]                                          | 1.12 [0.93-1.34]                                    |
| male                                          | 1312     | 0.93 [0.77-1.13]         | 1.26 [1.00-1.59]                                          | 1.19 [0.93-1.51]                                    |
| female                                        | 525      | 0.94 [0.76-1.17]         | 1.10 [0.86-1.42]                                          | 1.04 [0.79-1.37]                                    |
| <b>GHD (GH<sub>max</sub> 0-4)<sup>d</sup></b> | 485      | 0.72 [0.53-0.96]         | 0.94 [0.69-1.28]                                          | 0.87 [0.62-1.21]                                    |
| male                                          | 349      | 0.62 [0.41-0.95]         | 0.87 [0.56-1.36]                                          | 0.81 [0.51-1.30]                                    |
| female                                        | 136      | 0.89 [0.59-1.35]         | 1.03 [0.67-1.58]                                          | 0.94 [0.59-1.49]                                    |
| <b>GHD (GH<sub>max</sub> 5-9)<sup>d</sup></b> | 1352     | 1.00 [0.85-1.17]         | 1.28 [1.06-1.54]                                          | 1.22 [1.00-1.49]                                    |
| male                                          | 963      | 1.06 [0.86-1.32]         | 1.42 [1.11-1.83]                                          | 1.34 [1.03-1.74]                                    |
| female                                        | 389      | 0.96 [0.75-1.24]         | 1.13 [0.85-1.50]                                          | 1.09 [0.80-1.48]                                    |
| <b>ISS<sup>c</sup></b>                        | 899      | 0.94 [0.76-1.16]         | 1.18 [0.94-1.49]                                          | 1.15 [0.89-1.47]                                    |
| male                                          | 570      | 0.91 [0.68-1.23]         | 1.25 [0.90-1.74]                                          | 1.20 [0.85-1.68]                                    |
| female                                        | 329      | 0.93 [0.70-1.25]         | 1.12 [0.82-1.54]                                          | 1.11 [0.77-1.60]                                    |

<sup>a</sup> Restricted model adjusted only for age at start, height at start and sex (if not stratified for sex)

<sup>b</sup> Full model adjusted for gestational age, birth length, birth weight, age at start, height at start, parental educational level, family income and sex (if not stratified for sex)

<sup>c</sup> SGA=Small for Gestational Age, GHD=Growth Hormone Deficiency, ISS=Idiopathic Short Stature.

<sup>d</sup> GH<sub>max</sub> = Growth Hormone peak level on either provocation test (mainly Arginine-Insulin Tolerance Test) or during spontaneous 12h or 24h GH secretion profiles (µg/L).



**Table S7: Crude and adjusted hazard ratios for malignant neoplasms with two-year lag period after end of treatment**

|                           | events | pyrs   | IR [95% CI] <sup>a</sup> | Crude HR [95% CI] | Adjusted HR [95% CI], restricted model <sup>b</sup> | Adjusted HR [95% CI], full model <sup>c</sup> |
|---------------------------|--------|--------|--------------------------|-------------------|-----------------------------------------------------|-----------------------------------------------|
| Controls (n=50036)        | 1247   | 679374 | 18.4 [17.4-19.4]         | 1.00 (Ref)        | 1.00 (Ref)                                          | 1.00 (Ref)                                    |
| Patients (n=3408)         | 64     | 47104  | 13.6 [10.6-17.4]         | 0.74 [0.58-0.95]  | 0.88 [0.65-1.20]                                    | 0.86 [0.62-1.21]                              |
| Male controls (n=33861)   | 372    | 471290 | 7.9 [7.1-8.7]            | 1.00 (Ref)        | 1.00 (Ref)                                          | 1.00 (Ref)                                    |
| Male patients (n=2305)    | 15     | 32643  | 4.6 [2.8-7.6]            | 0.58 [0.35-0.97]  | 0.75 [0.41-1.36]                                    | 0.72 [0.38-1.37]                              |
| Female controls (n=16175) | 875    | 208085 | 42.1 [39.4-44.9]         | 1.00 (Ref)        | 1.00 (Ref)                                          | 1.00 (Ref)                                    |
| Female patients (n=1103)  | 49     | 14461  | 33.9 [25.6-44.8]         | 0.80 [0.60-1.07]  | 0.93 [0.64-1.33]                                    | 0.92 [0.62-1.37]                              |

<sup>a</sup> Events/10,000 pyrs

<sup>b</sup> Restricted model adjusted only for age at start, height at start and sex

<sup>c</sup> Full model adjusted for gestational age, birth length, birth weight, age at start, height at start, parental educational level, family income and sex

**Table S8: Hazard ratios for overall and malignant neoplasms by duration of follow-up, separated by sex**

|                                    | HR [95% CI] <sup>a</sup>     |                                |                              |
|------------------------------------|------------------------------|--------------------------------|------------------------------|
|                                    | Follow-up duration (0-9 yrs) | Follow-up duration (10-19 yrs) | Follow-up duration (≥20 yrs) |
| <b>Overall neoplastic events</b>   |                              |                                |                              |
| All patients                       | 1.15 [0.90-1.47]             | 1.22 [1.01-1.47]               | 1.25 [0.96-1.64]             |
| Males                              | 1.26 [0.93-1.71]             | 1.28 [0.99-1.67]               | 1.18 [0.84-1.67]             |
| Females                            | 0.97 [0.65-1.47]             | 1.18 [0.90-1.57]               | 1.36 [0.88-2.09]             |
|                                    |                              |                                |                              |
| <b>Malignant neoplastic events</b> |                              |                                |                              |
| All patients                       | 1.38 [0.46-4.11]             | 0.82 [0.53-1.29]               | 1.29 [0.79-2.09]             |
| Males                              | 1.05 [0.28-3.94]             | 0.21 [0.05-0.97]               | 1.36 [0.63-2.96]             |
| Females                            | 2.01 [0.23-17.7]             | 1.05 [0.65-1.70]               | 1.27 [0.68-2.37]             |

<sup>a</sup> Adjusted for gestational age, birth length, birth weight, age at start, height at start, parental educational level, family income and sex

**Figure S1:** Kaplan-Meier curves of overall neoplastic events, separated by sex

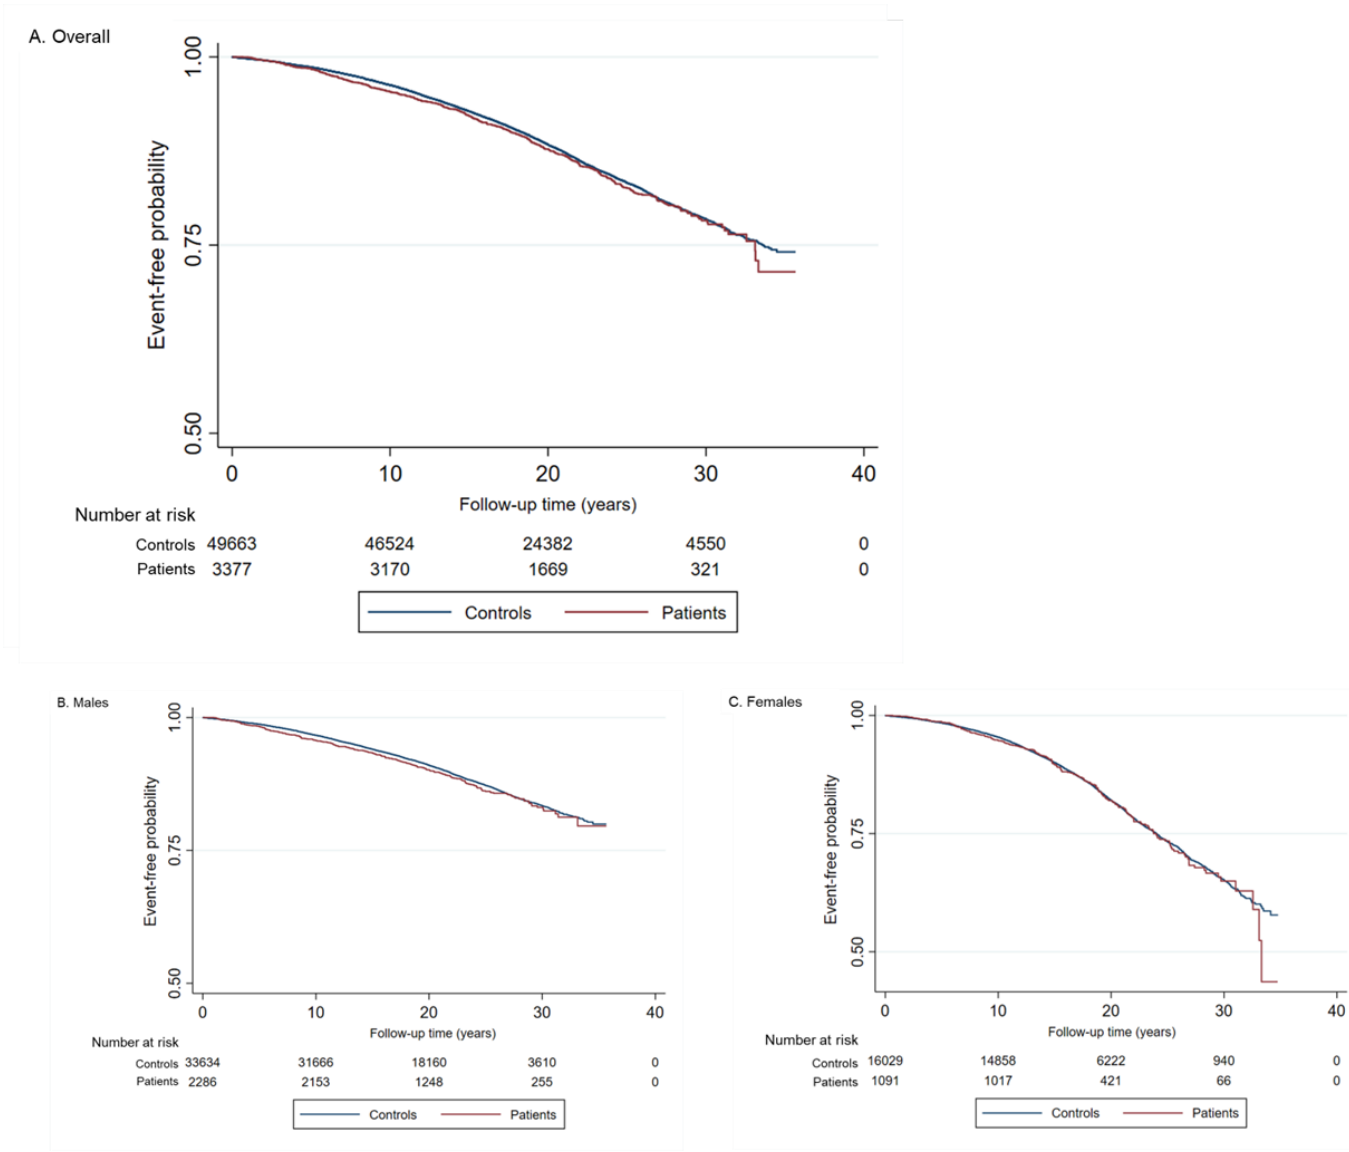

**Figure S2:** Kaplan-Meier curves of malignant neoplastic events, separated by sex

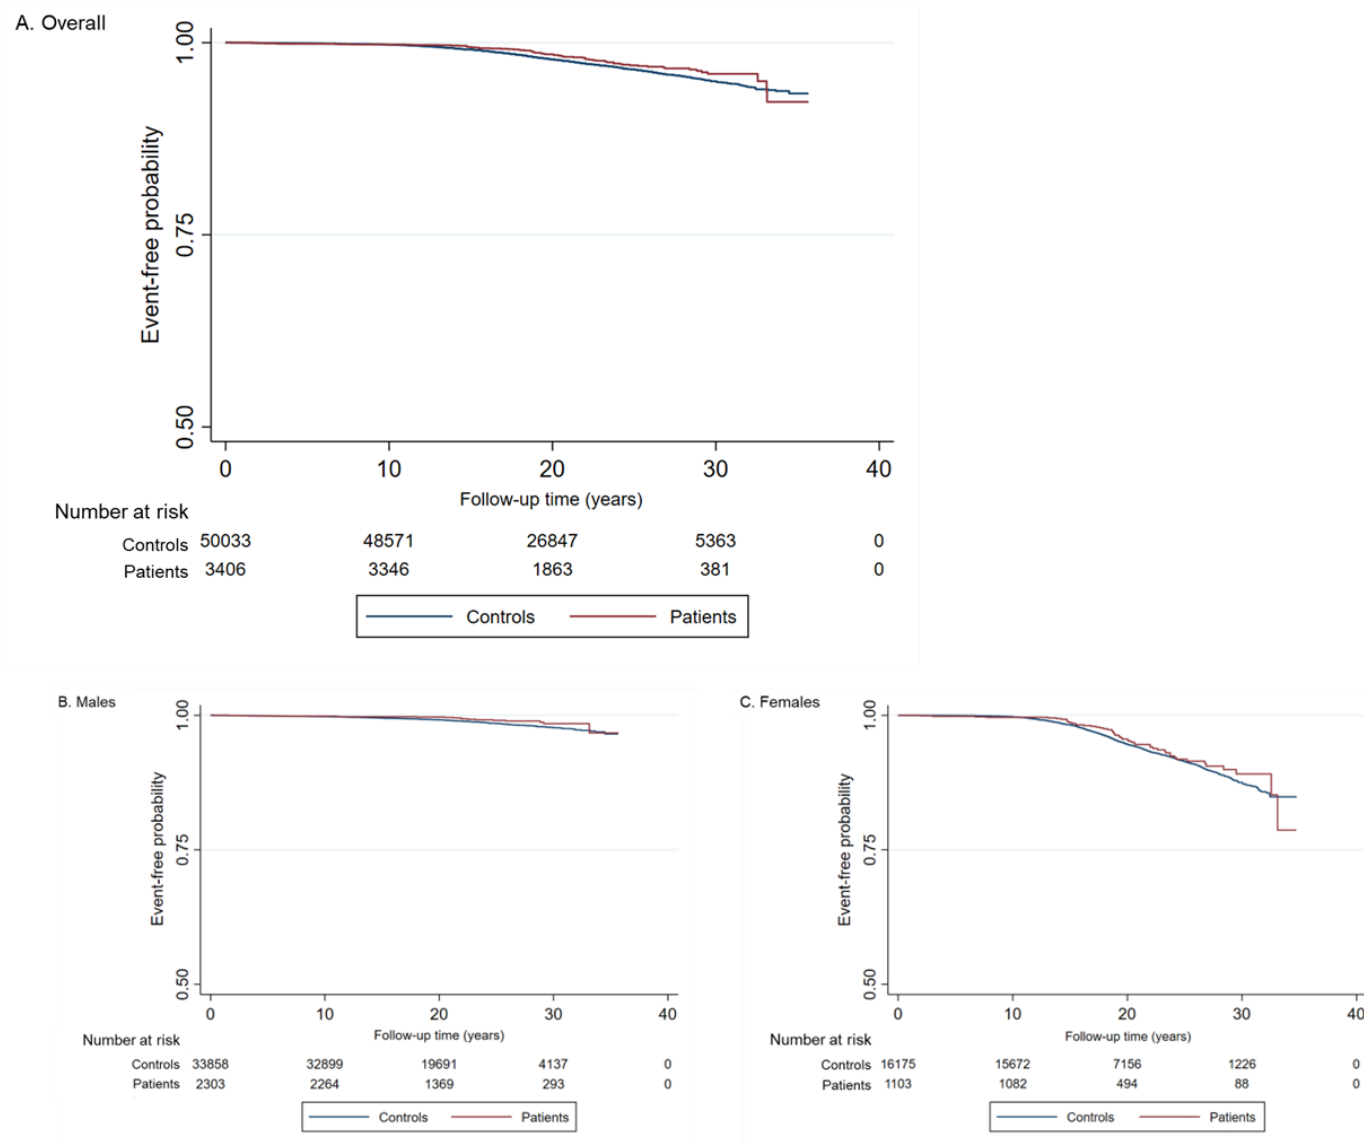

Supplement: DataSheet_1.pdf [file DataSheet_1.pdf]
